# Supplementary material for: Firearm Homicides of US Children Precipitated by Intimate Partner Violence: 2003–2020
Source: PubMed Central journal article supplement — Pediatrics. Author manuscript; Available in PMC 2024 Oct 22. (PMC11494689; doi:10.1542/peds.2023-063004), 2023-12-01
Supplement: NIHMS2025863-supplement-Appendices_1_and_2.pdf [file NIHMS2025863-supplement-Appendices_1_and_2.pdf]

## Supplemental Information

### APPENDIX 1

This study used data from the NVDRS for 2003 to 2020 from the following 51 states/jurisdictions: Alaska, Maryland, Massachusetts, New Jersey, Oregon, South Carolina, and Virginia (2003–2020); Colorado, Georgia, North Carolina, Oklahoma, Rhode Island, and Wisconsin (2004–2020); Kentucky, New Mexico, and Utah (2005–2020); Ohio (2011–2020) and Michigan (2014–2020); New York (2015–2018; 2020); Hawaii (2015, 2016, 2019); Arizona, Connecticut, Kansas, Maine, Minnesota, New Hampshire, and Vermont (2015–2020); Illinois, Indiana, Iowa, Pennsylvania, and Washington (2016–2020); California, Delaware, District of Columbia, Nevada, Puerto Rico, and West Virginia (2017–2020); Alabama, Louisiana, Missouri, and Nebraska (2018–2020); Montana, North Dakota, and Wyoming (2019–2020); and Arkansas, Idaho, Mississippi, South Dakota, Tennessee, and Texas (2020).

### APPENDIX 2

In the NVDRS, IPV-related includes homicide or legal intervention deaths that are related to immediate or ongoing conflict or violence between current or former intimate partners. These include all deaths where a victim is killed by their current or former intimate partner and homicides associated with IPV that are not deaths of the intimate partners themselves (eg, a father kills his child[ren] because of conflict with his estranged wife).

Many variables that are known to increase risk of homicide in IPV situations are subsumed under the circumstance IPV-related in NVDRS. To separate out the following known risk factors: Child custody dispute; divorce, impending or recent divorce, separation, breakup, or dissolving relationship between intimate partners; perpetrator had an existing domestic violence restraining order and examine them as separate circumstances for IPV-related child firearm homicides, we conducted a literal text search using the following a priori list of search terms or their derivative.

- Custody
- Custody dispute
- Custody fight
- Custody battle
- Disagreement
- Argument
- Argue
- Altercation
- Dispute
- Fight
- Disagree
- Supervise
- Supervised visit
- Fight over children
- Arrangement
- Arrange
- Divorce
- Estrange
- Separate
- Separation
- Moved out
- Protective order
- Guardian
- Custodian
- Injunction
- Legal fight
- Legal battle
- Legal
- Judicial proceeding
- Judicial
- Split
- Order
- Court
- Court hearing
- Hearing
- Court petition
- Judge
- Petition
- Mediation
- DVRO
- Domestic violence restraining order
- ERO
- ERPO
- Risk order
- Emergency restraining order
- Restraining order
- No contact
- Protective
- Protections
- Ex parte family violence protective order
- Temporary ex parte order
- Permanent order
- Ex parte
- Ex parte protective order
- Violence protective order
- Violating restraining order
- Violating protective order
- Stay away
- Shared custody
- More time with
- Shared
- Unsupervised
- Break
- Break up
- Broke up

- Ended
- Over
- Relationship ended
- Relationship over
- New boyfriend
- New girlfriend
- Dating new

- Marriage ended
- Dissolve
- Dissolution
- Visitation
- Attempting to leave
- Attempting
